# Supplementary material
Source: publisher site journal article supplement (https://www.dovepress.com/article/444619)
Supplement: Supplementary file 1 [file get_supplementary_file.php]

**Table S1 Prevalence of drug use among SLE patients**

| **Items** | N (%) |
| --- | --- |
| **Treatment received currently (multiple choices)** |  |
| Glucocorticoid | 431 (93.1) |
| Immunosuppressants (e.g., Mycophenolate mofetil / cyclophosphamide / leflunomide / methotrexate / tacrolimus / cyclosporine / azathioprine, etc.) | 270 (58.3) |
| Non-steroidal anti-inflammatory drugs (e.g., Naproxen / Meloxicam / Diclofenac sodium / Loxoprofen sodium, etc.) | 14 (3.0) |
| Biological agents (Belimumab / Rituximab / Telitacicept etc.) | 127 (27.4) |
| Hydroxychloroquine | 318 (68.7) |
| Other | 130 (28.1) |
| Unclear | 6 (1.3) |
| **The preferred route of pharmaceutical administration** |  |
| Subcutaneous injection | 296 (63.90) |
| Intravenous injection | 167 (36.10) |
| **Cost considerations pertaining to the utilization of biological agents** |  |
| Financially capable and inclined to opt for the cost | 191 (41.30) |
| Financially capable but disinclined to opt for the cost | 30 (6.50) |
| Financially incapable and thus disinclined to opt for the cost | 100 (21.60) |
| Despite being a significant financial burden, inclined to choose the cost nonetheless. | 142 (30.70) |
| **Acceptance of biologic therapy would be facilitated if they were included in health insurance coverage.** |  |
| Agree | 457 (98.7) |
| Disagree | 6 (1.2) |
| **Among the SLE patients whose treatment includes biologic therapy(n=127), the specific biologic therapy being used is： (multiple choices)** |  |
| Belimumab | 35 (27.6) |
| Telitacicept | 104 (81.9) |
| Rituximab | 3 (2.4) |
| other | 1 (0.8) |
| **Among the SLE patients whose treatment includes biologic therapy(n=127), feelings towards the use of biologic therapy is:** |  |
| The treatment is considered safe and effective. | 66 (52.0) |
| The treatment is perceived to have an acceptable effect, but patients experience serious adverse reactions. | 10 (7.9) |
| The treatment is considered ineffective and leads to serious adverse reactions. | 1 (0.8) |
| The efficacy and adverse reactions of the treatment are unclear. | 50 (39.4) |

**Table S2 Correlation**

|  | Knowledge | Attitudes | Practices |
| --- | --- | --- | --- |
| Knowledge | 1 |  |  |
| Attitudes | 0.327 (P = 0.000) | 1 |  |
| Practices | 0.269 (P = 0.000) | 0.102 (P = 0.000) | 1 |

**Table S3 Test results of the hypothesis.**

|  | Hypothesized paths | | | path coefficient | P |
| --- | --- | --- | --- | --- | --- |
| Hypothesis 1 | Attitude | <--- | Knowledge | 0.455 | < 0.001 |
| Hypothesis 2 | Practice | <--- | Knowledge | 0.709 | < 0.001 |
| Hypothesis 3 | Practice | <--- | Attitude | 0.049 | 0.58 |
| Hypothesis 4 | Attitude | <--- | Family support | -1.187 | 0.025 |
| Hypothesis 5 | Attitude | <--- | Time since SLE diagnosis | 0.33 | 0.018 |
| Hypothesis 6 | Knowledge | <--- | Parental status | 0.591 | 0.009 |
| Hypothesis 7 | Practice | <--- | Time since SLE diagnosis | -0.817 | 0.002 |
| Hypothesis 8 | Practice | <--- | Per Capita Income | 0.416 | 0.121 |
| Hypothesis 9 | Knowledge | <--- | Time since SLE diagnosis | 0.142 | 0.169 |

**Table S4 Model fitness indices for the KAP structural equation model**

| Goodness-of-Fit Indices | Ideal standards | Measurement value |
| --- | --- | --- |
| CMIN/DF | 1-3 | 1.533 |
| RMSEA | <0.08 | 0.034 |
| IFI | >0.8 | 0.948 |
| TLI | >0.8 | 0.902 |
| CFI | >0.8 | 0.944 |

CMIN/DF, Chi-square fit statistics/degree of freedom; RMSEA, root mean square error of approximation; IFI, incremental fix index; TLI, Tucker-Lewis index; CFI, comparative fix index.
